# 1 Osteosarcoma: novel prognostic biomarkers using circulating and cell-free tumour DNA

2

3 Iben Lyskjær<sup>1,2</sup>, Neesha Kara<sup>2</sup>, Solange De Noon<sup>1,3</sup>, Christopher Davies<sup>1,3</sup>, Ana Maia Rocha<sup>1,3</sup>,  
4 Anna-Christina Strobl<sup>3</sup>, Inga Usher<sup>1</sup>, Craig Gerrand<sup>4</sup>, Sandra J Strauss<sup>5</sup>, Daniel Schrimpf<sup>6</sup>,  
5 Andreas von Deimling<sup>6</sup>, Stephan Beck<sup>2\*</sup> & Adrienne M Flanagan<sup>1,3\*#</sup>

6

7 1: Research Department of Pathology, University College London, London, UK

8 2: Medical Genomics Research Group, University College London, London, UK

9 3: Department of Histopathology, Royal National Orthopaedic Hospital, Stanmore, HA7 4LP  
10 UK

11 4: Bone Tumour Unit, Royal National Orthopaedic Hospital, Stanmore, HA7 4LP, UK

12 5: Department of Oncology, University College London, London, UK

13 6: Department of Neuropathology, Institute of Pathology, University Hospital Heidelberg, and  
14 CCU Neuropathology, German Cancer Institute, Heidelberg, Germany

15

16 \*These authors contributed equally

17 #Corresponding author

18

19 Keywords: osteosarcoma, DNA methylation, epigenetics, epigenetic biomarkers, liquid  
20 biopsy, prognosis, circulating tumour DNA

21

## 22 Abstract

23 Osteosarcoma (OS) is the most common primary bone tumour in children and adolescents.  
24 Despite treatment with curative-intent, many patients die of this disease. Biomarkers for  
25 assessment of disease burden and prognoses for osteosarcoma are not available. Circulating-  
26 free (cfDNA) and -tumour DNA (ctDNA) are promising biomarkers for disease surveillance in  
27 several major cancer types, however only two such studies are reported for OS. In this  
28 combined discovery and validation study, we identified four novel methylation-based  
29 biomarkers in 171 OS tumours (test set) and comprehensively validated our findings *in silico*  
30 in two independent osteosarcoma sample datasets (n= 162, n=107) and experimentally using  
31 digital droplet PCR (ddPCR, n=20 OS tumours). Custom ddPCR assays for these biomarkers  
32 were able to detect ctDNA in 40% of pre-operative plasma samples (n=72). ctDNA was  
33 detected in 5/17 (29%) post-operative plasma samples from patients who experienced a  
34 subsequent relapse post-operatively. Both cfDNA levels and ctDNA detection independently  
35 correlated with overall survival, p=0.0015, p=0.0096, respectively. Combining both assays  
36 increased the prognostic value of the data. Our findings illustrate the utility of mutation-  
37 independent methylation-based markers, broadly applicable ctDNA assays for tumour  
38 surveillance and prognostication. This study lays the foundation for multi-institutional  
39 collaborative studies to explore the utility of plasma-derived biomarkers for predicting clinical  
40 outcome of OS.

41

42

NOTE: This preprint reports new research that has not been certified by peer review and should not be used to guide clinical practice.

## 43        **1. Introduction**

44        Osteosarcoma (OS) is the most common primary malignant bone tumour in childhood and  
45        adolescents, generally arising in the metaphysis of long bones<sup>1</sup>. Approximately 80-90% of all  
46        OS tumours are high grade, and despite toxic multimodal therapies, survival for the majority  
47        of patients with OS has not improved over the last 40 years<sup>2</sup>, with 30-40% of patients with OS  
48        dying of their disease<sup>3</sup>. Although, response to chemotherapy is an indicator of survival<sup>4</sup>, it is  
49        currently not possible to predict which patients are likely to respond to chemotherapy.

50

51        Studies have demonstrated the value of minimally invasive surveillance assays in cancer  
52        management including assessment of the efficacy of treatment through detection of residual  
53        tumour following surgery, and predicting response to chemotherapy or disease relapse<sup>5</sup>.  
54        Measurement of total circulating free and tumour DNA (cfDNA and ctDNA, respectively),  
55        representing DNA shed into the bloodstream by tumour cells, has been shown to correlate  
56        with important clinical endpoints (*e.g.* progression-free survival and or overall survival) in  
57        several cancer types, as reviewed in<sup>6-8</sup>. Barris *et al.* published the first ctDNA study in OS  
58        patients (10 patients, 28 samples) using targeted sequencing of genetic alterations detected  
59        in the tumours<sup>9</sup>, and found that ctDNA was detected in approximately half of the plasma  
60        samples (46%)<sup>9</sup>. Shulman *et al.* used ultra-low-pass whole-genome sequencing (WGS) and  
61        detected ctDNA in 57% (41/72 OS patients) of localised OS prior to treatment, and reported  
62        that detection of ctDNA was associated with inferior survival but the results were not  
63        statistically significant<sup>10</sup>.

64

65        In the human genome, DNA methylation predominantly occurs at CpG dinucleotides, the site  
66        where a cytosine residue precedes a guanine residue in the 5'-3' direction. In the healthy

67 human genome the majority of CpGs are methylated except at CpG islands<sup>11</sup>. Conversely, a  
68 cancer genome is often characterised by global hypomethylation and focal hypermethylation  
69 at CpG islands, leading to both genomic instability and transcriptional repression<sup>12</sup>. This  
70 feature of cancer has been exploited by studies, which demonstrate ctDNA methylation  
71 profiles as a highly sensitive and specific means of detecting cancers<sup>13</sup>. To date, only a few  
72 studies have investigated methylation of OS<sup>14–16</sup>. The use of DNA methylation as a marker of  
73 ctDNA in OS is attractive because this tumour is characterised by complex genomes and high  
74 inter-tumour heterogeneity rather than recurrent genetic alterations<sup>17–19</sup>, making selection  
75 of a universal genetic ctDNA marker challenging. Furthermore, as changes in methylation  
76 represent an early event in cancer and are considered to be retained through tumour  
77 evolution<sup>20</sup>, they could be exploited as powerful biomarkers and would be expected to be  
78 only moderately confounded by tumour genetic heterogeneity<sup>21</sup>. For this reason, this  
79 approach potentially has advantages over the two previous ctDNA studies in patients with  
80 osteosarcoma in which genomic alterations were targeted<sup>9,10</sup>.

81

82 It has been previously established that high levels of DNA in the circulation (cfDNA) have been  
83 linked to inferior outcome<sup>22–24</sup>. However, in contrast to ctDNA which represents a tumour-  
84 specific assay, cfDNA levels can be influenced by other factors including physical activity, age  
85 and rate of clearance. For these reasons cfDNA is considered a less reliable biomarker,  
86 particularly when measured shortly after surgery<sup>6</sup>. Despite this, the clinical utility of cfDNA as  
87 a prognostic marker has been proven in a wide range of cancers<sup>6</sup>.

88

89 The aim of this study was to identify plasma-derived biomarkers in patients with OS that could  
90 be used for predicting outcomes.

## 91        **2. Materials and methods**

### 92        **2.1. Ethical Approval**

93        The Royal National Orthopaedic Hospital (RNOH) Biobank is approved by the National  
94        Research Ethics Committee of the Health Research Committee (reference: Integrated  
95        Research Application System (IRAS) project identifier: 272816). This study was approved by  
96        the National Research Ethics Committee approved UCL/UCLH Biobank Ethics Committee  
97        (project no: EC17.14).

98

### 99        **2.2. Training methylation cohort**

100        Our *in-house* dataset consisted of 750 samples of various sarcoma subtypes (Supplementary  
101        Table 1) (EMBL-EBI, under accession number E-MTAB-9875) previously published<sup>25</sup>. Infinium  
102        450K methylation data was downloaded from TCGA (<https://www.cancer.gov/tcg>) using  
103        TCGAbiolinks<sup>26</sup> and from Marmal-aid<sup>27</sup> (kindly provided by Dr Robert Lowe, UCL, QMUL, UK)  
104        (Supplementary Table 2).

105

### 106        **2.3. External validation cohorts for identified methylation markers**

107        Validation Set I consisted of 450K and EPIC methylation raw IDAT files from 162 OS from  
108        Heidelberg, Germany (provided by DS and AVD<sup>28</sup>, GSE140686) and 699 peripheral blood  
109        leucocytes (PBLs) from non-cancer patients (GSE125105<sup>29</sup>). Validation Set II consisted of 21  
110        publicly available OS samples (GSE58770<sup>30</sup>), 86 OS samples from the TARGET-OS (Children's  
111        Oncology Group and The Hospital for Sick Children in Toronto, Canada, dbGaP accession  
112        phs000218.v21.p7, <http://ocg.cancer.gov/programs/target> and 732 healthy blood samples  
113        (GSE87571<sup>31</sup>).

114

## 115        **2.4. Biomarker discovery and digital droplet PCR assay design**

116        To avoid false positive results in the plasma samples, we first excluded all CpG sites that  
117        showed signs of DNA methylation ( $\beta$ -value > 0.2) in more than 1% of all peripheral blood  
118        leucocytes (PBLs) samples (TCGA/Marmal-aid cohorts). Next, we excluded a) CpGs that were  
119        hypomethylated ( $\beta$  < 0.5) in more than 20% of all OS cases, b) hypermethylated CpGs ( $\beta$  > 0.5)  
120        that were detected in more than 50% of other cancers and c) hypermethylated CpGs ( $\beta$  > 0.2)  
121        detected in more than >30% of healthy tissues (Supplementary Figure 1B).

122

123        The 17 identified candidate methylation markers (CpGs) were annotated using the *COHCAP*<sup>32</sup>  
124        R package (using the hg19 genome build). Methylation-specific digital droplet PCR (ddPCR)  
125        assays were designed using Primer3Plus<sup>33</sup> and MethPrimer<sup>34</sup>, and checked using BiSearch<sup>35</sup>.  
126        Receiver operating characteristics (ROC) analyses were performed using the pROC R  
127        package<sup>36</sup> to determine the sensitivity and specificity of the probes both individually and in  
128        combination (where at least two of the markers were positive). A  $\beta$ -value of 0.5 was chosen  
129        as the threshold for determining if a sample should be classified as positive. To be able to use  
130        a droplet digital PCR assay with the available plasma (1-2 mL), we reduced the number of  
131        markers from 17 to four. This was achieved by first calculating the sensitivities and  
132        specificities in the Training and Validation sets (Supplementary Table 8) and then identifying  
133        regions for which ddPCR assays could be designed. This led us to selecting the following CpGs  
134        for experimental validation; cg02169391, cg22082800, cg25680486, and cg26100986.

135

## 136        **2.5. Clinical samples for experimental validation**

137        Three clinical sample sets were available for experimental validation: 1) high grade OS tumour  
138        samples from 20 patients (Supplementary Table 3), 2) control plasma samples obtained from

139 47 healthy volunteers (2.5 mL plasma) and 69 individuals with benign bone disease (see below  
140 for list) and degenerative joint disease (referred to hereafter as non-cancer patients; 4.5 mL  
141 plasma, Supplementary Table 4), and 3) samples from 72 patients with OS; these included  
142 blood for germline DNA and their pre-operative, pre-treatment plasma samples, in addition  
143 to 17 post-OP plasma samples (a total of 89 plasma samples with a median of 4.5 mL, range  
144 3-4.5 mL (1-2 mL were used for ddPCR analysis), overview in Supplementary Table 6). The  
145 samples of benign bone disease mentioned above included simple bone cysts, osteoarthritis,  
146 osteoblastoma, fibrous dysplasia, osteoid osteoma, osteochondroma, tenosynovial giant cell  
147 tumour, synovial chondromatosis; the degenerative joint disease represented patients  
148 undergoing hip or knee replacements (Supplementary Table 7).

149

150 Clinical correlates

151 Osteosarcoma patients were identified from a research database of patients diagnosed and  
152 managed within the London Sarcoma Service and included patients of all ages with  
153 demographic data incorporating primary site of disease, tumour grade and size, treatment  
154 parameters (chemotherapy, surgery and radiotherapy) as well as pathological response to  
155 chemotherapy and outcome (Supplementary Table 5).

156

## 157 **2.6. Statistical analysis**

158 All statistical analysis was performed in R (version 3.6.1)<sup>37</sup>. A p-value <5% was deemed  
159 statistically significant. A ctDNA-positive sample was defined as a sample with a least two of  
160 the four methylation markers above the limit of detection (LOD). Survival analysis was  
161 performed using the Kaplan-Meier estimator with death as the end point. The multivariate

162 analysiis was a Cox proportional hazards regression model with time from diagnosis to  
163 death or censorship (time to last follow-up) as an end point.

164

## 165 **2.7. Data availability**

166 *In-house* raw methylation array data have previously been published<sup>25</sup> and are available from  
167 the ArrayExpress database at EMBL-EBI ([www.ebi.ac.uk/arrayexpress](http://www.ebi.ac.uk/arrayexpress)), accession number E-  
168 MTAB-9875.

169

## 170 **3. Results**

### 171 **3.1. *In silico* identification and validation of methylation markers through large scale** 172 **bioinformatic analyses**

173 Our first step in the identification of novel CpG sites as candidates for ctDNA assays involved  
174 downloading and interrogating the publicly available methylation data from 8,730 and 2,885  
175 human tissue samples from the TCGA<sup>38</sup> and Marmal-Aid<sup>27</sup>, respectively (Supplementary Table  
176 2, and Figure 1 for study outline). 10,766 samples were eligible for further analysis after  
177 filtering for incomplete data (Methods, Supplementary Figure 1A), and were analysed  
178 alongside 750 *in-house* sarcoma methylation profiles (Supplementary Figure 1A). Data from  
179 the remaining 10,766 samples were used for bioinformatic analysis together with 750 of our  
180 *in-house* sarcoma samples<sup>25</sup>. Hence, the final discovery group included methylome data from  
181 11,516 samples, including 1,578 blood samples, 202 normal tissues, 9,565 non-OS cancer  
182 samples and 171 OS tumour samples (Supplementary Figure 1, Supplementary Tables 1 and  
183 2).

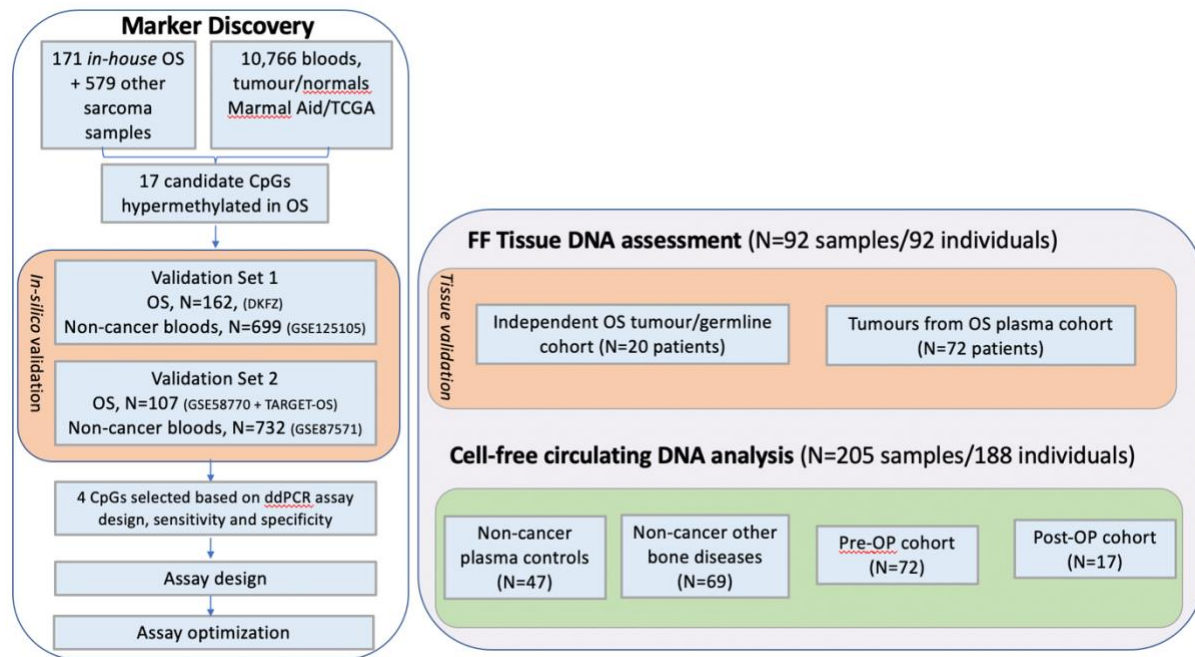

184

185 **Figure 1: Overview of the combined biomarker and validation study.** 17 osteosarcoma-

186 specific candidate methylation markers were identified through a stepwise approach for

187 selecting CpG sites uniquely methylated in OS (see Methods). Four markers were chosen for

188 methylation-specific digital droplet PCR (ddPCR) analysis. The markers were subsequently

189 validated both *in silico* and experimentally in tissue, before being used for circulating tumour

190 DNA assessment of plasma samples from osteosarcoma patients. ‘Other sarcoma’ denotes

191 various other non-OS soft tissue and bone sarcoma subtypes. FF: fresh frozen tumour tissue.

192

### 193 3.1.1. Osteosarcoma-specific DNA methylation markers

194 We next took a stepwise approach to identify DNA methylation markers (CpG sites), which

195 were uniquely methylated in OS (Supplementary Figure 1B). Using our screening pipeline

196 (Supplementary Figure 1B), we identified 17 candidate hypermethylated markers for OS

197 (Supplementary Figure 2). To obtain an estimate of their combined sensitivity and specificity,

198 we performed receiver operating characteristic (ROC) curve analysis on 171 OS and 1,578



199 non-cancer PBLs (Training Set). The mean area under the curve (AUC) was 0.994 and included  
200 all 171 OS and only 11/1578 (0.7%) non-cancer PBLs samples (Supplementary Figure 3A).

201

### 202 **3.1.2. Candidate DNA methylation markers show robust performance in independent** 203 **OS datasets**

204 Two independent rounds of *in silico* validation of these candidate methylation markers were  
205 performed using Validation Set 1 comprising 162 OS tumour and 699 non-cancer PBLs, and  
206 Validation Set II consisting of 107 OS tumour and 732 PBL samples (Materials and Methods).  
207 By including all 17 candidate markers with a  $\beta$ -value cut-off  $\geq 0.5$ , all OS in both validation  
208 sample sets were correctly classified. None of the 699 PBLs were hypermethylated ( $\beta \geq 0.5$ )  
209 at any of the 17 candidate markers in Validation Set 1, and only two of 732 PBLs (0.27%) from  
210 non-cancer patients were misclassified as OS in Validation Set 2. ROC analyses gave an AUC =  
211 1.00 for Validation Set 1 and AUC = 0.99 for Validation Set 2 (Supplementary Figure 3B and  
212 3C).

213

### 214 **3.1.3. Four candidate DNA methylation markers were selected for experimental** 215 **validation**

216 Digital droplet PCR-based assays were chosen as the method for ctDNA measurement as this  
217 represents a widely employed and highly sensitive, specific, and cost-effective methodology.  
218 The amount of plasma available from patients and the number of markers that can be multi-  
219 plexed represent limitations of this approach and therefore from the 17 candidate markers,  
220 we selected four CpGs (cg02169391, cg22082800, cg25680486, and cg26100986) to take  
221 forward (Methods). Hypermethylation of all four markers correctly identified 421/440 of all  
222 OS samples studied (95.7%) and misclassified only 6/3009 (false positives = 0.2%) non-cancer

223 PBLs as OS *in silico* (Training and the two Validation Sets) (Supplementary Table 8,  
224 Supplementary Figure 4).

225

## 226 3.2. Experimental validation of methylation markers in clinical OS cohorts

### 227 3.2.1. Candidate markers are highly sensitive and specific

228 To validate further the sensitivity and specificity of the four markers, we tested these as two  
229 duplex ddPCR assays experimentally on samples from another set of 20 high-grade OS and  
230 matching germline blood DNA (Supplementary Table 3). Hypermethylation at these CpG sites  
231 was confirmed in each of the tumours and in none of the germline samples (Supplementary  
232 Figure 5).

233

234 To refine the limit of detection (LOD, Materials and Methods and Supplementary Methods),  
235 we also applied the four assays (two duplexed assays) to 47 control plasma samples from  
236 patients with non-neoplastic conditions (Supplementary Table 6, Supplementary Figure 5)  
237 and plasma from 69 individuals with benign bone disease (Methods, Supplementary Table 7).  
238 3/116 samples gave a false positive result (cases 57920 and 59831 (osteochondromas) and  
239 63637 (healthy volunteer), with an overall specificity of 97.4%.

### 240 3.2.2. Circulating tumour DNA detection correlates with disease progression

241 Finally, we measured the four methylation markers in matched tumour, PBLs and pre-  
242 treatment plasma samples from 72 patients with OS (Supplementary Table 4 and 5). Based  
243 on the probes with the highest methylation levels observed in the tumour tissue, we ran one  
244 duplexed assay on the matched plasma sample. If neither or only one of the methylation  
245 markers was detected, we ran the other duplex assay. Although we observed methylation of

246 at least one marker in 50/72 (69%) samples, we set a minimum of at least two markers to be  
247 detected above the LOD for a sample to be classified as 'ctDNA positive' and employed this  
248 criterion hereafter.

249

250 Clinical outcome data was then assessed against our pre-operative ctDNA assay results (Table  
251 1). Multivariate analysis confirmed that the presence of metastases at diagnosis is an  
252 independent prognostic factor in our cohort (Table 2), a finding consistent with the  
253 literature<sup>39</sup>. ctDNA assays were positive in 29/72 (40%) pre-operative samples (ctDNA<sup>pre+</sup>,  
254 Table 1, Supplementary table 4). Within this ctDNA<sup>pre+</sup> group, 12/29 patients had metastatic  
255 disease at diagnosis. Of the 17 ctDNA<sup>pre+</sup> patients with localised disease at diagnosis, 10  
256 suffered a disease related event (death, n= 8; or metastasis, n=2). The remaining seven  
257 ctDNA<sup>pre+</sup> patients were alive without disease at last follow up (median follow-up = 5.3 years,  
258 range 0.9-11.3 years, Supplementary Table 5). Overall, the detection of pre-treatment ctDNA  
259 correlated with inferior survival outcomes (p<0.01, Figure 2A, Table1) and with a disease-  
260 related event (p=0.01, chi-square test), but not with tumour size (p=0.14, Student's t-test),  
261 gender (0.53) or age at presentation (p=0.92). ctDNA positivity did not have a significant  
262 association with outcome on multivariate analysis, however it should be noted that this  
263 model also included metastatic disease status at diagnosis which is known to be linked to  
264 increased tumour burden<sup>40,41</sup>, and thus higher probability of ctDNA detection.

265

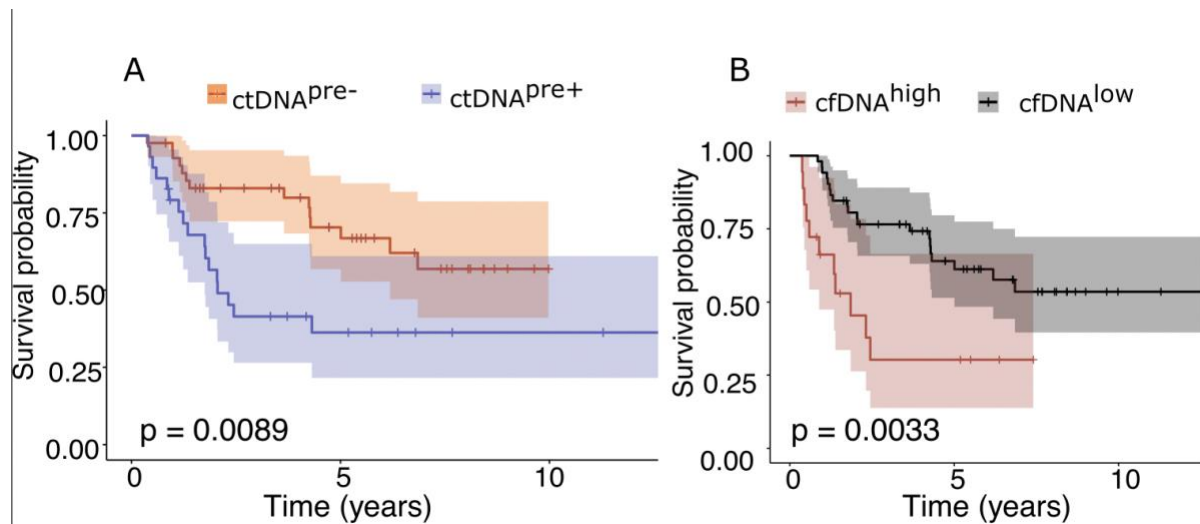

266

267 **Figure 2: Detection of ctDNA or high levels of cfDNA pre-operatively correlates with survival**

268 A) Detection of ctDNA and B) cfDNA pre-operatively correlate with overall survival (disease-  
269 related mortality or censorship). Survival analysis utilised a standard Cox proportional  
270 hazard model. The plots are censored after 12 years.

271

272 We also analysed post-operative plasma available from 17 of the 72 patients with OS in whom  
273 ctDNA was detected pre-treatment. ctDNA was detected in 5/17 (29%, median days from  
274 surgery 18, range: 7-30 days), 4/5 of whom developed recurrent disease (local recurrence or  
275 metastasis) and or died of disease (Supplementary Table 5), the remaining patient (OS\_66) is  
276 alive and well nine years post-surgery. The ctDNA biomarkers were detected in 2/4 patients  
277 before the clinical relapse was identified. Detection of ctDNA post-operatively was not  
278 associated with the presence of metastasis at diagnosis ( $p=0.45$ , Student's t-test). Of the  
279 patients for whom post-operative samples were available, four and 12 resection specimens  
280 were reported as having a good and poor response to chemotherapy, respectively (one  
281 unknown), and all cases were reported as having been fully excised.

282

### 283 3.2.3. Total circulating free DNA levels correlate with outcome

284 Finally, we measured the total amount of cfDNA in the patients' plasma samples, the median  
285 level of which was 1,848 copies/mL plasma (range 231-15,180 copies/mL plasma). This  
286 correlated with survival (cutoff=75<sup>th</sup> centile, cfDNA<sup>high</sup>, p=0.003, Figure 2B), but not with  
287 tumour size (rho=0.63, spearman rank test), metastasis at diagnosis (p=0.18, Kruskal-Wallis  
288 rank sum test) or anatomical site (femur versus tibia; p=0.63, Kruskal-Wallis rank sum test).  
289 12/19 (63%) of those patients classified as cfDNA<sup>high</sup> were also ctDNA<sup>pre+</sup>; of the remaining  
290 7/19 cfDNA<sup>high</sup> cases without ctDNA<sup>pre+</sup>, two had metastasis at diagnosis and another two  
291 relapsed (Supplementary Table 5). Including cfDNA<sup>high</sup> as a risk factor for adverse outcomes  
292 alongside ctDNA<sup>pre+</sup> and metastases at diagnosis resulted in 41/72 (57%) patients classed as  
293 high risk at the time of diagnosis. This three risk factor approach correlated with a poor  
294 prognosis for this group (p=0.01, Supplementary Figure 6, Supplementary Table 5).

295

## 296 4. Discussion

297 The standard of care for patients with osteosarcoma<sup>2</sup> results in an approximate 70% five-year  
298 overall survival, thus despite aggressive multi-drug treatment 30-40% die of their disease. The  
299 identification of metastases at diagnosis is the most reliable indication that a patient with  
300 osteosarcoma has an unfavourable prognosis. However, other factors also contribute to  
301 outcome, including tumour size and site, and response to chemotherapy, site<sup>42,43</sup>.  
302 Nevertheless, even when combining all these clinical variables, clinicians lack sufficient  
303 information to stratify patients adequately for treatment and to offer patients with OS a  
304 reliable prognosis.

305

306 Here, we report a pipeline for the development and application of DNA methylation markers  
307 in OS and demonstrate their utility in detecting ctDNA and show that their detection in plasma  
308 correlates with inferior clinical outcome. Importantly, these methylation markers were  
309 detected in the pre-treatment ctDNA of 32% of patients who did not have metastases at  
310 presentation, indicating that this assay has the potential to complement and add value to  
311 current criteria for guiding treatment and providing more accurate prognoses to patients.  
312 However, 24% of patients with a positive pre-operative ctDNA test remain disease-free, which  
313 may in some cases be linked to a follow-up period of less than five years. The cfDNA results  
314 confirmed the ctDNA findings in most cases with 63% of patients with a high level of cfDNA  
315 also being ctDNA<sup>pre+</sup>.

316

317 The four selected methylation markers appear to be highly specific and sensitive for OS, being  
318 detected in 421/440 (96%, Discovery and Validated Sets) cases analysed *in silico*, and  
319 therefore have the potential to be an applicable test for up to 90% of patients with high grade  
320 OS. False positive ctDNA results in patients without OS using our methylation markers were  
321 rare (2.6%) and should not lead to misdiagnoses or inappropriate management provided  
322 results are interpreted in the context of the full clinical picture including medical imaging  
323 typically in the form of a multidisciplinary meeting. In this context, our study represents a  
324 first step towards the goal of turning cancer including OS into a chronic but manageable  
325 disease<sup>44</sup>.

326

327 The reason for failing to detect ctDNA in 60% of patients, particularly in those presenting with  
328 metastases or whose disease progressed, is unexplained. Nevertheless, it is noteworthy that  
329 relatively similar results (54%<sup>9</sup> and 43%<sup>10</sup> not detected) were reported in two other studies,

330 which involved different study designs and which employed different technologies for the  
331 detection of ctDNA. The study of Barras *et al.* only included ten patients, and that of Shulman  
332 *et al.* only studied patients without metastasis at presentation<sup>9,10</sup>. Furthermore, our study  
333 included patients aged between five and 95 years, whereas the other two studies were  
334 conducted in patients younger than 35 years<sup>9,10</sup>. It is possible that the sensitivity of all assays  
335 undertaken in the different studies could be improved if larger blood volumes were available  
336 for analysis. However, the similar findings across the three studies suggest that the  
337 pathobiology of tumours that shed detectable levels of ctDNA may be different from those  
338 where this does not occur. This finding is not comparable to the results from other cancers,  
339 where ctDNA is detectable in the vast majority of high grade cases in cancers such as lung<sup>45</sup>,  
340 ovary<sup>46</sup> and bladder<sup>47</sup>. Indeed, ctDNA is even detected in small colorectal cancer lesions and  
341 is being considered as a screening test for early detection of this disease<sup>48</sup>. ctDNA is also  
342 detected in virtually all high grade chondrosarcomas, another bone cancer, but not in low  
343 grade cases<sup>49</sup>.

344

345 It would be interesting to test head-to-head the various technologies which have been  
346 employed to assess ctDNA in OS patients, but this is difficult to undertake because each assay  
347 requires a considerable volume of blood. Nevertheless, a greater understanding of why ctDNA  
348 is only detected in some patients may be revealed by interpreting the findings in the context  
349 of other features such as the pathology, the medical imaging, as well as multi-omic tumour  
350 profiles.

351

352 The limitations of the study are related to the application of the methylation markers to  
353 clinical outcome and are largely attributable to the rarity of osteosarcoma, the incidence of

354 which is 0.27/100,000 per year in England<sup>50</sup>. The consequence of this includes the relatively  
355 small number of samples analysed within a heterogenous cohort of patients across all age  
356 groups, and a relatively short median follow-up of approximately 3.5 years. The small number  
357 of post-operative samples, and the absence of an independent cohort in which our findings  
358 could be validated are also limitations. The small numbers of samples that were available for  
359 analysis post-treatment was disappointing but the finding that ctDNA is detectable prior to  
360 presentation of clinical relapse is encouraging and requires further investigation.

361

362 The study highlights the need for multi-centre collaboration, to enable the prospective  
363 systematic collection and sharing of patient samples with annotated clinical data, to recruit  
364 sufficient patient numbers for validation of these biomarkers and determination of their  
365 clinical utility in osteosarcomas, or any other rare disease. Multi-centre studies are fraught  
366 with challenges; they are expensive, time-consuming to establish, and it can be difficult to  
367 agree and prioritise research aims and studies. Nevertheless, results generated by different  
368 groups can add value and provide an opportunity for cross-validation. To this end, the ICONIC  
369 study (Improving Outcomes through collaboration in Osteosarcoma)<sup>51</sup>, brought together the  
370 osteosarcoma clinical and research communities across the UK and provides the  
371 infrastructure to prospectively evaluate clinical and biological questions, such as this, to  
372 better stratify patients for treatments and improve outcome. It is currently recruiting newly  
373 diagnosed OS patients across the UK<sup>52</sup>.

374

### 375 **Acknowledgements**

376 Funding for this project was received from the Tom Prince Cancer Trust, The Rosetrees and  
377 Stoneygate Trusts (M46-F1) and the Bone Cancer Research Trust (BRCT: 6519). IL is supported



378 by the Lundbeck Foundation (R303-2018-3018) and previously by the Tom Prince Cancer  
379 Trust. NK was funded by Imperial College London. SB acknowledges support from the  
380 Wellcome Trust (WT-218274/Z/19/Z). The study was also supported by the National Institute  
381 for Health Research, UCL Genomics and Genome Engineering, UCL Great Ormond Street  
382 Institute of Child Health and Pathology Core facilities, the Cancer Research UK University  
383 College London Experimental Cancer Medicine Centre, and the RNOH Research and  
384 Development Department. AMR and CD was supported by the Tom Prince Cancer Trust. SJS  
385 was supported by the National Institute for Health Research, the University College London  
386 Hospitals Biomedical Research Centre.

387 The authors thank Dr Sarah Ø. Jensen and Dr Jacob H. Fredsøe, Aarhus University in Denmark,  
388 for inputs to the biomarker discovery, Professor Gert Attard and Dr Anjui Wu for a valuable  
389 discussion of the experimental design as well as Dr Robert Lowe for sharing data from the  
390 Marmal-Aid database. The results generated in this article are partly based upon data  
391 generated by the TCGA research Network (<http://cancergenome.nih.gov>), Marmal-Aid  
392 database and the Therapeutically Applicable Research to Generate Effective Treatments  
393 (TARGET) initiative managed by the NCI. We acknowledge the RNOH Biobank Team and all  
394 healthcare workers who cared for the patients. We give a special thanks to the patients for  
395 their donating invaluable samples for research.

396

#### 397 **Statement of author contribution**

398 Conceptualization: IL, SB, AMF; Sample curation: AMF; Data curation: IL, NK, AMR, CD, ACS,  
399 IU, DS, AVD; Analysis: IL, NK, SDN; Clinical data: AMF, SDN, CG, SJS; Supervision: SB, AMF;  
400 Writing: IL, SB, AMF, SDN; Review and editing: All authors.

401

## 402 References

- 403 1. Misaghi, A., Goldin, A., Awad, M. & Kulidjian, A. A. Osteosarcoma: a comprehensive  
404 review. *SICOT-J* (2018). doi:10.1051/sicotj/2017028
- 405 2. Gerrand, C. *et al.* UK guidelines for the management of bone sarcomas. *Clin. Sarcoma*  
406 *Res.* **6**, 7 (2016).
- 407 3. Durfee, R. A., Mohammed, M. & Luu, H. H. Review of Osteosarcoma and Current  
408 Management. *Rheumatol. Ther.* (2016). doi:10.1007/s40744-016-0046-y
- 409 4. Kager, L. *et al.* Primary metastatic osteosarcoma: Presentation and outcome of  
410 patients treated on neoadjuvant Cooperative Osteosarcoma Study Group protocols. *J.*  
411 *Clin. Oncol.* (2003). doi:10.1200/JCO.2003.08.132
- 412 5. Kilgour, E., Rothwell, D. G., Brady, G. & Dive, C. Liquid Biopsy-Based Biomarkers of  
413 Treatment Response and Resistance. *Cancer Cell* (2020).  
414 doi:10.1016/j.ccell.2020.03.012
- 415 6. Bronkhorst, A. J., Ungerer, V. & Holdenrieder, S. The emerging role of cell-free DNA as  
416 a molecular marker for cancer management. *Biomolecular Detection and*  
417 *Quantification* (2019). doi:10.1016/j.bdq.2019.100087
- 418 7. Morris, V. K. & Strickler, J. H. Use of Circulating Cell-Free DNA to Guide Precision  
419 Medicine in Patients with Colorectal Cancer. *Annual Review of Medicine* (2021).  
420 doi:10.1146/annurev-med-070119-120448
- 421 8. Cescon, D. W., Bratman, S. V., Chan, S. M. & Siu, L. L. Circulating tumor DNA and liquid  
422 biopsy in oncology. *Nat. Cancer* (2020). doi:10.1038/s43018-020-0043-5
- 423 9. Barris, D. M. *et al.* Detection of circulating tumor DNA in patients with osteosarcoma.  
424 *Oncotarget* (2018). doi:10.18632/oncotarget.24268
- 425 10. Shulman, D. S. *et al.* Detection of circulating tumour DNA is associated with inferior  
426 outcomes in Ewing sarcoma and osteosarcoma: a report from the Children's  
427 Oncology Group. *Br. J. Cancer* (2018). doi:10.1038/s41416-018-0212-9
- 428 11. Suzuki, M. M. & Bird, A. DNA methylation landscapes: Provocative insights from  
429 epigenomics. *Nature Reviews Genetics* (2008). doi:10.1038/nrg2341
- 430 12. Baylin, S. B. & Jones, P. A. A decade of exploring the cancer epigenome-biological and  
431 translational implications. *Nature Reviews Cancer* (2011). doi:10.1038/nrc3130
- 432 13. Koch, A. *et al.* Analysis of DNA methylation in cancer: Location revisited. *Nature*  
433 *Reviews Clinical Oncology* (2018). doi:10.1038/s41571-018-0004-4

- 434 14. Chen, X. G., Ma, L. & Xu, J. X. Abnormal DNA methylation may contribute to the  
435 progression of osteosarcoma. *Mol. Med. Rep.* (2018). doi:10.3892/mmr.2017.7869
- 436 15. Tian, W., Li, Y., Zhang, J., Li, J. & Gao, J. Combined analysis of DNA methylation and  
437 gene expression profiles of osteosarcoma identified several prognosis signatures.  
438 *Gene* (2018). doi:10.1016/j.gene.2018.01.093
- 439 16. Rosenblum, J. M. *et al.* Predictive properties of DNA methylation patterns in primary  
440 tumor samples for osteosarcoma relapse status. *Epigenetics* (2015).  
441 doi:10.4161/15592294.2014.989084
- 442 17. Behjati, S. *et al.* Recurrent mutation of IGF signalling genes and distinct patterns of  
443 genomic rearrangement in osteosarcoma. *Nat. Commun.* (2017).  
444 doi:10.1038/ncomms15936
- 445 18. Wu, C. C. *et al.* Immuno-genomic landscape of osteosarcoma. *Nat. Commun.* (2020).  
446 doi:10.1038/s41467-020-14646-w
- 447 19. Bousquet, M. *et al.* Whole-exome sequencing in osteosarcoma reveals important  
448 heterogeneity of genetic alterations. *Ann. Oncol.* (2016).  
449 doi:10.1093/annonc/mdw009
- 450 20. Klutstein, M., Nejman, D., Greenfield, R. & Cedar, H. DNA methylation in cancer and  
451 aging. *Cancer Research* (2016). doi:10.1158/0008-5472.CAN-15-3278
- 452 21. Gai, W. & Sun, K. Epigenetic Biomarkers in Cell-Free DNA and Applications in Liquid  
453 Biopsy. *Genes (Basel)*. (2019). doi:10.3390/genes10010032
- 454 22. Tissot, C. *et al.* Circulating free DNA concentration is an independent prognostic  
455 biomarker in lung cancer. *Eur. Respir. J.* (2015). doi:10.1183/13993003.00676-2015
- 456 23. Spindler, K. L. G., Pallisgaard, N., Vogelius, I. & Jakobsen, A. Quantitative cell-free  
457 DNA, KRAS, and BRAF mutations in plasma from patients with metastatic colorectal  
458 cancer during treatment with cetuximab and irinotecan. *Clin. Cancer Res.* (2012).  
459 doi:10.1158/1078-0432.CCR-11-0564
- 460 24. Lyskjær, I. *et al.* Correlation between early dynamics in circulating tumour DNA and  
461 outcome from FOLFIRI treatment in metastatic colorectal cancer. *Sci. Rep.* **9**, (2019).
- 462 25. Lyskjær, I., De Noon, S., Tirabosco, R. DNA methylation-based profiling of bone and  
463 soft tissue tumours: a validation study of the 'DKFZ Sarcoma Classifier'. *J. Pathol. Clin.*  
464 *Res.* (2021). doi:<https://doi.org/10.1002/cjp2.215>
- 465 26. Colaprico, A. *et al.* TCGAblinks: An R/Bioconductor package for integrative analysis

- 466 of TCGA data. *Nucleic Acids Res.* (2016). doi:10.1093/nar/gkv1507
- 467 27. Lowe, R. & Rakyan, V. K. Marmalaid—a database for Infinium HumanMethylation450.  
468 *BMC Bioinformatics* (2013). doi:10.1186/1471-2105-14-359
- 469 28. Koelsche, C. *et al.* Sarcoma classification by DNA methylation profiling. *Nat. Commun.*  
470 **12**, (2021).
- 471 29. Barrett, T. *et al.* NCBI GEO: Archive for functional genomics data sets - Update.  
472 *Nucleic Acids Res.* (2013). doi:10.1093/nar/gks1193
- 473 30. Moriarity, B. S. *et al.* A Sleeping Beauty forward genetic screen identifies new genes  
474 and pathways driving osteosarcoma development and metastasis. *Nat. Genet.* (2015).  
475 doi:10.1038/ng.3293
- 476 31. Johansson, Å., Enroth, S. & Gyllenstein, U. Continuous Aging of the Human DNA  
477 Methylome Throughout the Human Lifespan. *PLoS One* (2013).  
478 doi:10.1371/journal.pone.0067378
- 479 32. Warden, C. D. *et al.* COHCAP: An integrative genomic pipeline for single-nucleotide  
480 resolution DNA methylation analysis. *Nucleic Acids Res.* (2013).  
481 doi:10.1093/nar/gkt242
- 482 33. Untergasser, A. *et al.* Primer3—new capabilities and interfaces. *Nucleic Acids Res.*  
483 (2012). doi:10.1093/nar/gks596
- 484 34. Li, L. C. & Dahiya, R. MethPrimer: Designing primers for methylation PCRs.  
485 *Bioinformatics* (2002). doi:10.1093/bioinformatics/18.11.1427
- 486 35. Arányi, T. & Tusnády, G. E. BiSearch: ePCR tool for native or bisulfite-treated genomic  
487 template. *Methods Mol. Biol.* (2007). doi:10.1385/1-59745-528-8:385
- 488 36. Robin, X. *et al.* pROC: An open-source package for R and S+ to analyze and compare  
489 ROC curves. *BMC Bioinformatics* (2011). doi:10.1186/1471-2105-12-77
- 490 37. R Core Team. R: A language and environment for statistical computing.  
491 <http://www.R-project.org/>. *R Foundation for Statistical Computing, Vienna, Austria*  
492 (2017).
- 493 38. Tomczak, K., Czerwińska, P. & Wiznerowicz, M. The Cancer Genome Atlas (TCGA): An  
494 immeasurable source of knowledge. *Wspolczesna Onkologia* (2015).  
495 doi:10.5114/wo.2014.47136
- 496 39. SALAH, S., AHMAD, R., SULTAN, I., YASER, S. & SHEHADEH, A. Osteosarcoma with  
497 metastasis at initial diagnosis: Current outcomes and prognostic factors in the context

- 498 of a comprehensive cancer center. *Mol. Clin. Oncol.* (2014).  
499 doi:10.3892/mco.2014.325
- 500 40. Iacovelli, R., Lanoy, E., Albiges, L. & Escudier, B. Tumour burden is an independent  
501 prognostic factor in metastatic renal cell carcinoma. *BJU Int.* (2012).  
502 doi:10.1111/j.1464-410X.2012.11518.x
- 503 41. Gómez, O. H. *et al.* "High Tumor Burden" in Metastatic Non-Small Cell Lung Cancer:  
504 Defining the Concept. *Cancer Manag. Res.* (2021). doi:10.2147/CMAR.S302928
- 505 42. Bramer, J. A. M., van Linge, J. H., Grimer, R. J. & Scholten, R. J. P. M. Prognostic factors  
506 in localized extremity osteosarcoma: A systematic review. *European Journal of*  
507 *Surgical Oncology* (2009). doi:10.1016/j.ejso.2009.01.011
- 508 43. Xin, S. & Wei, G. Prognostic factors in osteosarcoma: A study level meta-analysis and  
509 systematic review of current practice. *J. Bone Oncol.* (2020).  
510 doi:10.1016/j.jbo.2020.100281
- 511 44. Beck, S. & Ng, T. C2c: Turning cancer into chronic disease. *Genome Medicine* (2014).  
512 doi:10.1186/gm555
- 513 45. Wang, H. *et al.* The Role of Circulating Tumor DNA in Advanced Non-Small Cell Lung  
514 Cancer Patients Treated With Immune Checkpoint Inhibitors: A Systematic Review  
515 and Meta-Analysis. *Frontiers in Oncology* (2021). doi:10.3389/fonc.2021.671874
- 516 46. Asante, D. B., Calapre, L., Ziman, M., Meniawy, T. M. & Gray, E. S. Liquid biopsy in  
517 ovarian cancer using circulating tumor DNA and cells: Ready for prime time? *Cancer*  
518 *Letters* (2020). doi:10.1016/j.canlet.2019.10.014
- 519 47. Birkenkamp-Demtröder, K. *et al.* Longitudinal assessment of multiplex patient-specific  
520 ctDNA biomarkers in bladder cancer for diagnosis, surveillance and recurrence. *Ann.*  
521 *Oncol.* (2018). doi:10.1093/annonc/mdy269.084
- 522 48. Reinert, T. *et al.* Analysis of Plasma Cell-Free DNA by Ultradeep Sequencing in  
523 Patients with Stages I to III Colorectal Cancer. *JAMA Oncol.* (2019).  
524 doi:10.1001/jamaoncol.2019.0528
- 525 49. Lyskjær, I. *et al.* Circulating tumour DNA is a promising biomarker for risk  
526 stratification of central chondrosarcoma with IDH1/2 and GNAS mutations. *Mol.*  
527 *Oncol.* (2021). doi:10.1002/1878-0261.13102
- 528 50. R., G. *et al.* UK guidelines for the management of bone sarcomas. *Sarcoma* (2010).  
529 doi:<http://dx.doi.org/10.1155/2010/317462>

- 530 51. ICONIC: Improving Outcomes Through Collaboration in Osteosarcoma (ICONIC).  
531 Available at: <https://clinicaltrials.gov/ct2/show/NCT04132895>.
- 532 52. ICONIC – Improving Outcomes through Collaboration In Osteosarcoma. Available at:  
533 <https://www.bcrct.org.uk/research/current-research-projects/iconic>.  
534  
535  
536

537 **Tables**

538 Table 1. Correlation of clinical outcome with pre-treatment ctDNA. PR: poor responder; GR:  
539 good responder, NCG: No chemo given, ctDNA: circulating tumour DNA.

|                                   | ctDNA pre neg (n=43)                       | ctDNA pre pos (n=29)                                        |
|-----------------------------------|--------------------------------------------|-------------------------------------------------------------|
| Metastasis at diagnosis (n=19)    | 7 (16%)                                    | 12 (41%)                                                    |
| No metastases at diagnosis (n=53) | 36 (68%)                                   | 17 (32%)                                                    |
| Die of disease (n=32)             | 14 (33%)                                   | 18 (62%)                                                    |
| Disease-related event (n=39)      | 18 (42%)                                   | 21 (72%)                                                    |
| Response to chemotherapy          | PR: 28 (65%)<br>GR: 9 (21%)<br>NCG:6 (14%) | PR: 11 (38%)<br>GR: 8 (28%)<br>NCG:4 (14%)<br>Unknown/NA: 5 |

540

541 **Table 2:** Uni-and multivariate analysis of clinical factors and their relation to survival. cfDNA:  
542 circulating free DNA; ctDNA: circulating tumour DNA; pre-OP: pre-operatively.

| SURVIVAL                                 | Univariate analysis |        |                            | Multivariate analysis |        |               |
|------------------------------------------|---------------------|--------|----------------------------|-----------------------|--------|---------------|
|                                          | HR                  | 95% CI | P-value                    | HR                    | 95% CI | P-value       |
| <b>Pre-OP cfDNA (n=72)</b>               |                     |        |                            |                       |        |               |
| <75th centile (n=53)                     | 0.34                | 0.38   | <b>0.005</b>               | 0.56                  | 0.43   | 0.18          |
| >75th centile (n=19)                     | REFERENCE           |        |                            |                       |        |               |
| <b>Pre-OP ctDNA (n=72)</b>               |                     |        |                            |                       |        |               |
| Neg (n=43)                               | REFERENCE           |        |                            |                       |        |               |
| Pos (n=29)                               | 2.51                | 0.36   | <b>0.01</b>                | 1.48                  | 0.42   | 0.36          |
| <b>Metastasis at presentation (n=72)</b> |                     |        |                            |                       |        |               |
| Yes (n=19)                               | 5                   | 0.37   | <b>1.2*10<sup>-5</sup></b> | 3.78                  | 0.40   | <b>0.0096</b> |
| No (n=53)                                | REFERENCE           |        |                            |                       |        |               |
| <b>Gender (n=72)</b>                     |                     |        |                            |                       |        |               |

|                               |           |      |      |  |  |  |
|-------------------------------|-----------|------|------|--|--|--|
| Male (n=38)                   | REFERENCE |      |      |  |  |  |
| Female (n=34)                 | 1.16      | 0.36 | 0.68 |  |  |  |
| <b>Age (n=72)</b>             |           |      |      |  |  |  |
| <30 years (n=62)              | REFERENCE |      |      |  |  |  |
| =>30 years (n=10)             | 1.14      | 0.54 | 0.81 |  |  |  |
| <b>Max tumour size (n=64)</b> |           |      |      |  |  |  |
| <=80 mm (n=14)                | REFERENCE |      |      |  |  |  |
| >80 mm (n=50)                 | 1.38      | 0.5  | 0.51 |  |  |  |

543
